# Supplementary material for: Garcinia cambogia Phenolics as Potent Anti-COVID-19 Agents: Phytochemical Profiling, Biological Activities, and Molecular Docking
Source: MDPI journal article supplement (doi:10.3390/plants11192521), 2022-09-26
Supplement: s1 [file s1]

## Supplementary

# ***Garcinia cambogia* phenolics as potent anti-COVID-19 agents: phytochemical profiling, biological activities and molecular docking**

Hanan Y. Aati <sup>1†</sup>, Ahmed Ismail <sup>2†</sup>, Mostafa E. Rateb <sup>3\*</sup>, Asmaa M. AboulMagd <sup>4</sup>, Hossam M. Hassan <sup>5\*</sup>, Mona H. Hetta <sup>2</sup>

<sup>1</sup> Department of Pharmacognosy, College of Pharmacy, King Saud University, P.O. Box 2457, Riyadh 11451, Saudi Arabia; e-mail: [hati@ksu.edu.sa](mailto:hati@ksu.edu.sa)

<sup>2</sup> Pharmacognosy Department, Faculty of Pharmacy, Fayoum University, Fayoum, Egypt; e-mail: [ais03@fayoum.edu.eg](mailto:ais03@fayoum.edu.eg)

<sup>3</sup> School of Computing, Engineering & Physical Sciences, University of the West of Scotland, Paisley PA1 2BE, Scotland, UK; e-mail: [Mostafa.Rateb@uws.ac.uk](mailto:Mostafa.Rateb@uws.ac.uk)

<sup>4</sup> Department of Pharmaceutical Chemistry, Faculty of Pharmacy, Nahda University (NUB), Beni-Suef, Egypt; [asmaa.aboulmaged@nub.edu.eg](mailto:asmaa.aboulmaged@nub.edu.eg)

<sup>5</sup> Pharmacognosy Department, Faculty of Pharmacy, Beni-Suef University, Banī Suwayf, Egypt; e-mail: [hossam.mokhtar@nub.edu.eg](mailto:hossam.mokhtar@nub.edu.eg)

<sup>5</sup> Pharmacognosy Department, Faculty of Pharmacy, Fayoum University, Fayoum, Egypt; e-mail: [mhm07@fayoum.edu.eg](mailto:mhm07@fayoum.edu.eg)

\* Correspondence: [Mostafa.Rateb@uws.ac.uk](mailto:Mostafa.Rateb@uws.ac.uk) and [hossam.mokhtar@nub.edu.eg](mailto:hossam.mokhtar@nub.edu.eg)

<sup>†</sup>Equal contribution as first author

**Figure S1:** Photograph of *Garcinia cambogia* Roxb. fruit.

**Figure S2:** HPLC fingerprint of total 70% ethanol extract of *Garcinia cambogia* Roxb. fruits rind.

**Figure S3:** Effect of isolated compounds on 3CL Protease SARS-CoV-2 Activity (M<sup>Pro</sup> assay) compared to Plumbagin standard.

**Figure S4:** Standard curves 3CL Protease SARS-CoV-2 Activity (M<sup>Pro</sup> assay) on isolated compounds.

**Figure S5:** Effect of compound 5 on Human coronavirus (COVID-19) compared to Remdesivir.

**Figure S6:** Standard curves of effect of compound 5 on Human Coronavirus (COVID-19) compared to remdesivir.

**Table S1:** Chemical profiling of the secondary metabolites of total 70% ethanol extract of *Garcinia cambogia* Roxb. fruits rind using LC–HR–ESI–MS.

**Table S2:** Detailed 3CL Protease SARS-CoV-2 Activity (M<sup>Pro</sup> assay) on isolated compounds.

**Table S3:** Effect of *Garcinia cambogia* Roxb. isolated compounds on Human Coronavirus (COVID-19).

**Table S4:** Evaluation of EC<sub>50</sub> and percentage of inhibition of compound 5 on Human Coronavirus (COVID-19) compared to Remdesivir.

### ***Metabolomic analysis***

The total extract (1 mg/ml in MeOH) was uploaded on an Accela HPLC (Thermo Fisher Scientific, Bremen, Germany) combined with Accela UV/VIS and Exactive (Orbitrap) mass spectrometer from Thermo Fisher Scientific (Bremen, Germany). The mobile phase composed of water (A) and acetonitrile (B) with 0.1% formic acid in each solvent. The gradient elution started at a flow rate of 300  $\mu$ L/min with 10% B linearly increased to 100% B within 30 min and remained isocratic for the next 5 min before linearly decreasing back to 10% B for the following 1 minute. The mobile phase was then equilibrated for 9 min before the next injection. The mass range was set from m/z (mass-to-charge ratio) 100–2000 for ESI-MS using in-source CID (collision-induced dissociation) mechanism and m/z 50–1000 for MS/MS using untargeted HCD (high energy collision dissociation). In MZmine 2.12, a framework for differential analysis of mass spectrometry data, the raw data were imported. Chromatogram deconvolution was then performed, followed by peaks deisotoping. For chromatographic alignment and gap-filling, the retention time normalizer was applied. Excel macros were used to combine positive and negative ionization mode data files generated by MZmine. Peaks produced from the sample were extracted. Excel macro was used to dereplicate each m/z ion peak with compounds in the customized database (using RT and m/z threshold of  $\pm 5$  ppm), which provided details on the putative identities of all metabolites in the total extract. The excel macro was then utilized to identify the top 20 features (ranked by peak intensity) and the corresponding putative identities by creating a list for the extract. The

metabolites were then identified by comparison with some online and in-house databases.

### ***Phytochemical study***

An aliquot of the DCM fraction (1.1 g) was subjected to silica gel VLC (45 × 3cm, 50g) and eluted with *n*-hexane/Ethyl acetate mixture in 5% increment. Similar fractions were combined to give two subfractions (A1-A2). Subfraction A1 (150 mg, *n*-hexane/Ethyl acetate (50:50)) was rechromatographed on silica gel (60 cm × 1.4cm, 15g) with gradient elution using DCM/MeOH in 5 % increment using **S<sub>1</sub>**. The subfraction eluted with 20% MeOH in DCM was rechromatographed on Sephadex LH-20 and eluted with (DCM/MeOH; 1:1) to yield compound **1** (12 mg). The subfraction A2, (150 mg, *n*-hexane/Ethyl acetate (25:75)) was repurified using silica gel column (60cm × 1.4cm, 15g) and eluted with DCM/MeOH (1 % increment) using **S<sub>2</sub>** and followed by Sephadex LH-20 (applying the band dissolved in DCM with least amount of MeOH) using 5% MeOH/DCM for elution, and compound **2** (10 mg) was obtained.

EtOAc fraction (1.2 g) was chromatographed on a silica gel column (52 cm × 3.5 cm, 35 g) using DCM/MeOH as an eluent in a gradient elution to yield two subfractions. The collected DCM/MeOH (95:5) eluate was subjected to another silica gel CC (30 cm × 1.2 cm, 10g) using **S<sub>3</sub>** to give compound **2** (45 mg). The collected subfraction DCM/MeOH (65:35) eluate was further subjected to silica gel CC (45 cm × 2.5 cm, 40g) and eluted with the gradient solvent DCM/MeOH and using **S<sub>4</sub>** which was further purified using

sephadex LH-20 (5cm x 1 cm, 6 g) and eluted with MeOH and resulted by compound 3 (10 mg). The *n*-BuOH extract (2.2 g) was suspended in 5 ml distilled water and poured on a polyamide column and eluted with H<sub>2</sub>O (100%) and a mixture of H<sub>2</sub>O/MeOH in a gradient elution (75, 50 and 25%). The fraction (H<sub>2</sub>O/MeOH, 25%) was further rechromatographed on Diaion® HP-20 resin column (85cm x 3cm x 50gm) and eluted with H<sub>2</sub>O/MeOH mixture ratio and the similar eluted subfractions were compiled together using S<sub>4</sub> to obtain compound 4,(15 mg) and compound 5,(10 mg).

An aliquot of water fraction left after *n*-butanol (1.25 g) was partitioned on a CC using 50 g spherical regular silica (Sorbtech Norcross GA30071, USA) and isocratically eluted with 65 % DCM/MeOH using S<sub>4</sub> and S<sub>5</sub>, followed by RP-HPLC, to yield compound 6 (t<sub>R</sub> = 7.1 min, 15 mg).

The total phenolics content of *Garcinia cambogia* Roxb. fruit rind was extracted from the water fraction left after *n*-butanol fraction (3 g) using a previous reported method [25]. Two compounds were isolated; compound 7 (12 mg), and compound 8 (17 mg).

The following solvent systems were used for developing the TLC Chromatography chromatograms, based on several trials; S<sub>1</sub>: CH<sub>2</sub>Cl<sub>2</sub>/MeOH; 9:1; S<sub>2</sub>: CH<sub>2</sub>Cl<sub>2</sub>/MeOH; 7.5:2.5; S<sub>3</sub>: CH<sub>2</sub>Cl<sub>2</sub>/MeOH; 8:2; S<sub>4</sub>: CHCl<sub>3</sub>/MeOH/H<sub>2</sub>O; 15:6:2 and S<sub>5</sub>: Ethyl acetate/formic acid/acetic acid/H<sub>2</sub>O; 26:2.3:2.3:15.

**Table S1: Chemical profiling of the secondary metabolites of total 70% ethanol extract of *Garcinia cambogia* Roxb. fruits rind using LC–HR–ESI–MS.**

| Identified Metabolites              | m/z    | Retention time | Peak area (mzXML) | Conc. (µg/g) |
|-------------------------------------|--------|----------------|-------------------|--------------|
| Protocatechuic acid                 | 155.11 | 7.02           | 1388.90           | 197.85       |
| <i>P</i> - coumaric acid            | 164.06 | 10.88          | 3332.82           | 306.33       |
| Vanillic acid                       | 169.09 | 6.14           | 1505.50           | 245.20       |
| Gallic acid                         | 170.12 | 12.96          | 2569.58           | 198.27       |
| Hydroxycitric acid                  | 208.19 | 19.76          | 2437.11           | 123.34       |
| Vomifoliol                          | 225.15 | 22.84          | 6705.40           | 293.58       |
| Naringenin                          | 273.07 | 2.67           | 7857.69           | 2942.96      |
| Isopimara-7,15-diene                | 273.26 | 27.84          | 2361.10           | 84.81        |
| Isopimara-7,15-dien-19-ol           | 289.24 | 18.77          | 39355.33          | 2096.71      |
| Catechin                            | 290.79 | 17.6           | 525.73            | 29.87        |
| Epicatechin                         | 290.79 | 17.6           | 525.73            | 29.87        |
| Quercetin                           | 302.28 | 35.63          | 614.25            | 17.24        |
| 9,12-Dihydroxy-15-nonadecenoic acid | 329.26 | 24.5           | 2272.10           | 92.74        |
| Lariciresinol                       | 361.17 | 18.74          | 1873.89           | 99.99        |
| Glanduloidin C                      | 399.18 | 8.24           | 572.04            | 69.42        |
| Stigmasterol                        | 413.36 | 19.41          | 536.46            | 27.64        |
| $\beta$ -sitosterol                 | 415.36 | 20.32          | 816.49            | 40.18        |
| Garcinoic acid                      | 426.6  | 32.53          | 1917.79           | 58.95        |
| Vitexin                             | 432.38 | 34.08          | 2197.16           | 64.77        |
| Prunin                              | 434.41 | 19.45          | 413.29            | 21.25        |
| Salvileucolide methyl ester         | 449.29 | 12.95          | 2079.73           | 160.60       |
| Epigallocatechin-3-gallate          | 458.37 | 34.14          | 1155.74           | 33.85        |
| Guttiferone Q                       | 503.18 | 2.19           | 3023.71           | 1380.69      |
| Guttiferone R                       | 519.32 | 8.91           | 1713.46           | 192.31       |
| Guttiferone S                       | 519.32 | 8.91           | 1713.46           | 192.31       |
| Hinokiflavone                       | 539.09 | 35.54          | 2278.63           | 64.11        |
| Amentoflavone                       | 539.1  | 35.54          | 2278.63           | 64.11        |
| Dihydrohinokiflavone                | 541.11 | 28.84          | 1363.47           | 47.28        |
| Dihydroamentoflavone                | 541.12 | 28.84          | 1363.47           | 47.28        |
| 2,3-dihydrobilobetin                | 555.13 | 13.31          | 380.94            | 28.62        |
| Isoginkgetin                        | 567.13 | 12.13          | 438.49            | 36.15        |
| $\beta$ -Sitosterol-D-glucoside     | 577.46 | 15.89          | 5529.46           | 347.98       |
| Naringin                            | 581.15 | 35.46          | 1933.11           | 54.52        |
| kaempferol 3-O-rutinoside           | 594.95 | 29.38          | 4353.49           | 148.18       |
| Rutin                               | 610.51 | 39.1           | 2731.20           | 69.85        |

\* mzXML: Mass spectrometry data format

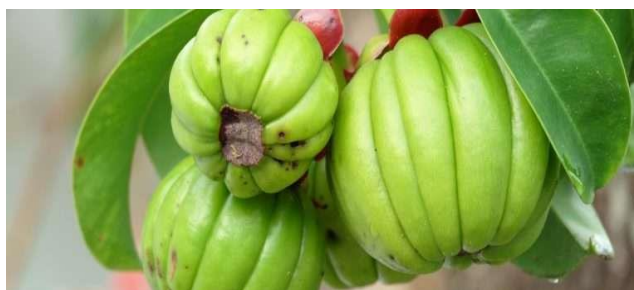

Figure S1: Photograph of *Garcinia cambogia* Roxb. fruit

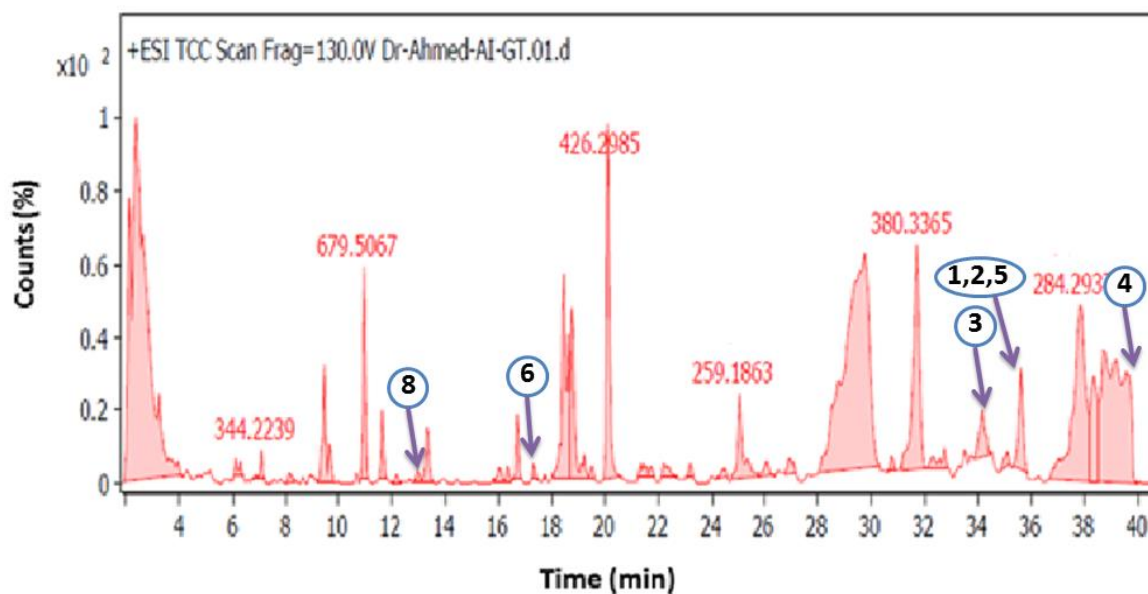

A

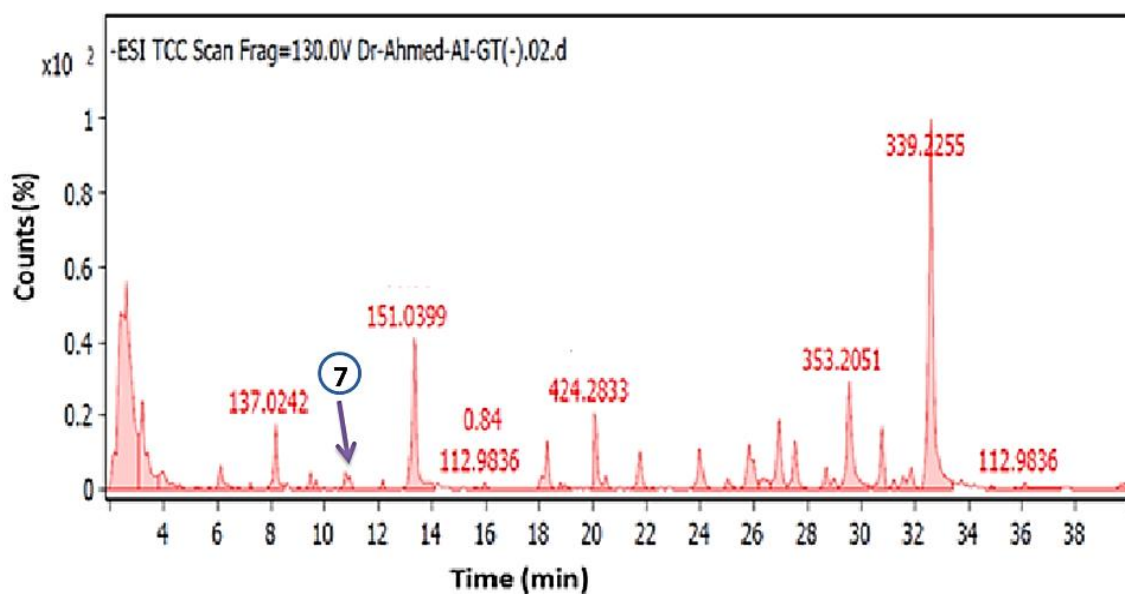

B

Figure S2: HPLC fingerprint of total 70% ethanol extract of *Garcinia cambogia* Roxb. fruit rind. A: positive mode, B: Negative mode.

**Table S2: Detailed 3CL Protease SARS-CoV-2 Activity (M<sup>Pro</sup> assay) on isolated compounds (1-8) from *Garcinia cambogia* Roxb. Fruit and plumbagin positive control.**

| Code                | Conc. | Log | %inh  | T2 | T1 | ΔT | RFU2  | RFU1 | ΔRFU  | Slope  | Kinetic Activity |
|---------------------|-------|-----|-------|----|----|----|-------|------|-------|--------|------------------|
| <b>1</b>            | 100   | 2   | 70.43 | 30 | 0  | 30 | 29.57 | 0    | 29.57 | 3.3333 | 35.4844          |
|                     | 10    | 1   | 21.54 | 30 | 0  | 30 | 78.46 | 0    | 78.46 | 3.3333 | 94.1529          |
|                     | 1     | 0   | 7.849 | 30 | 0  | 30 | 92.15 | 0    | 92.15 | 3.3333 | 110.581          |
|                     | 0.1   | -1  | 3.239 | 30 | 0  | 30 | 96.76 | 0    | 96.76 | 3.3333 | 116.113          |
| <b>2</b>            | 100   | 2   | 62.98 | 30 | 0  | 30 | 37.02 | 0    | 37.02 | 3.3333 | 44.4244          |
|                     | 10    | 1   | 21.04 | 30 | 0  | 30 | 78.96 | 0    | 78.96 | 3.3333 | 94.7529          |
|                     | 1     | 0   | 5.849 | 30 | 0  | 30 | 94.15 | 0    | 94.15 | 3.3333 | 112.981          |
|                     | 0.1   | -1  | 2.079 | 30 | 0  | 30 | 97.92 | 0    | 97.92 | 3.3333 | 117.505          |
| <b>3</b>            | 100   | 2   | 61.05 | 30 | 0  | 30 | 38.95 | 0    | 38.95 | 3.3333 | 46.7405          |
|                     | 10    | 1   | 17.39 | 30 | 0  | 30 | 82.61 | 0    | 82.61 | 3.3333 | 99.133           |
|                     | 1     | 0   | 8.119 | 30 | 0  | 30 | 91.88 | 0    | 91.88 | 3.3333 | 110.257          |
|                     | 0.1   | -1  | 2.409 | 30 | 0  | 30 | 97.59 | 0    | 97.59 | 3.3333 | 117.109          |
| <b>4</b>            | 100   | 2   | 73.08 | 30 | 0  | 30 | 26.92 | 0    | 26.92 | 3.3333 | 32.3043          |
|                     | 10    | 1   | 22.58 | 30 | 0  | 30 | 77.42 | 0    | 77.42 | 3.3333 | 92.9049          |
|                     | 1     | 0   | 8.279 | 30 | 0  | 30 | 91.72 | 0    | 91.72 | 3.3333 | 110.065          |
|                     | 0.1   | -1  | 3.269 | 30 | 0  | 30 | 96.73 | 0    | 96.73 | 3.3333 | 116.077          |
| <b>5</b>            | 100   | 2   | 78.48 | 30 | 0  | 30 | 21.52 | 0    | 21.52 | 3.3333 | 25.8243          |
|                     | 10    | 1   | 33.14 | 30 | 0  | 30 | 66.86 | 0    | 66.86 | 3.3333 | 80.2328          |
|                     | 1     | 0   | 15.03 | 30 | 0  | 30 | 84.97 | 0    | 84.97 | 3.3333 | 101.965          |
|                     | 0.1   | -1  | 1.969 | 30 | 0  | 30 | 98.03 | 0    | 98.03 | 3.3333 | 117.637          |
| <b>6</b>            | 100   | 2   | 72.25 | 30 | 0  | 30 | 27.75 | 0    | 27.75 | 3.3333 | 33.3003          |
|                     | 10    | 1   | 30.64 | 30 | 0  | 30 | 69.36 | 0    | 69.36 | 3.3333 | 83.2328          |
|                     | 1     | 0   | 10.69 | 30 | 0  | 30 | 89.31 | 0    | 89.31 | 3.3333 | 107.173          |
|                     | 0.1   | -1  | 5.039 | 30 | 0  | 30 | 94.96 | 0    | 94.96 | 3.3333 | 113.953          |
| <b>7</b>            | 100   | 2   | 64.94 | 30 | 0  | 30 | 35.06 | 0    | 35.06 | 3.3333 | 42.0724          |
|                     | 10    | 1   | 16.39 | 30 | 0  | 30 | 83.61 | 0    | 83.61 | 3.3333 | 100.333          |
|                     | 1     | 0   | 5.079 | 30 | 0  | 30 | 94.92 | 0    | 94.92 | 3.3333 | 113.905          |
|                     | 0.1   | -1  | 1.269 | 30 | 0  | 30 | 98.73 | 0    | 98.73 | 3.3333 | 118.477          |
| <b>8</b>            | 100   | 2   | 75.14 | 30 | 0  | 30 | 24.86 | 0    | 24.86 | 3.3333 | 29.8323          |
|                     | 10    | 1   | 22.42 | 30 | 0  | 30 | 77.58 | 0    | 77.58 | 3.3333 | 93.0969          |
|                     | 1     | 0   | 8.969 | 30 | 0  | 30 | 91.03 | 0    | 91.03 | 3.3333 | 109.237          |
|                     | 0.1   | -1  | 2.079 | 30 | 0  | 30 | 97.92 | 0    | 97.92 | 3.3333 | 117.505          |
| <b>Plumbagin</b>    | 100   | 2   | 77.48 | 30 | 0  | 30 | 22.52 | 0    | 22.52 | 3.3333 | 27.0243          |
|                     | 10    | 1   | 35.04 | 30 | 0  | 30 | 64.96 | 0    | 64.96 | 3.3333 | 77.9528          |
|                     | 1     | 0   | 14.29 | 30 | 0  | 30 | 85.71 | 0    | 85.71 | 3.3333 | 102.853          |
|                     | 0.1   | -1  | 4.109 | 30 | 0  | 30 | 95.89 | 0    | 95.89 | 3.3333 | 115.069          |
| <b>* Post cont.</b> |       |     | 0     | 30 | 0  | 30 | 100   | 0    | 100   | 3.3333 | 120              |

\* Post. cont.: COVID-19 Positive control template

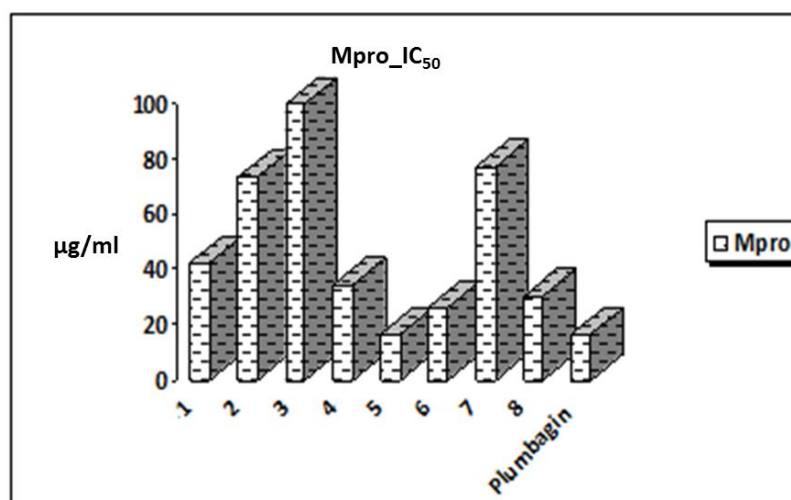

**Figure S3.** Effect of isolated compounds on 3CL Protease SARS-CoV-2 Activity ( $M^{Pro}$  assay) compared to Plumbagin standard.



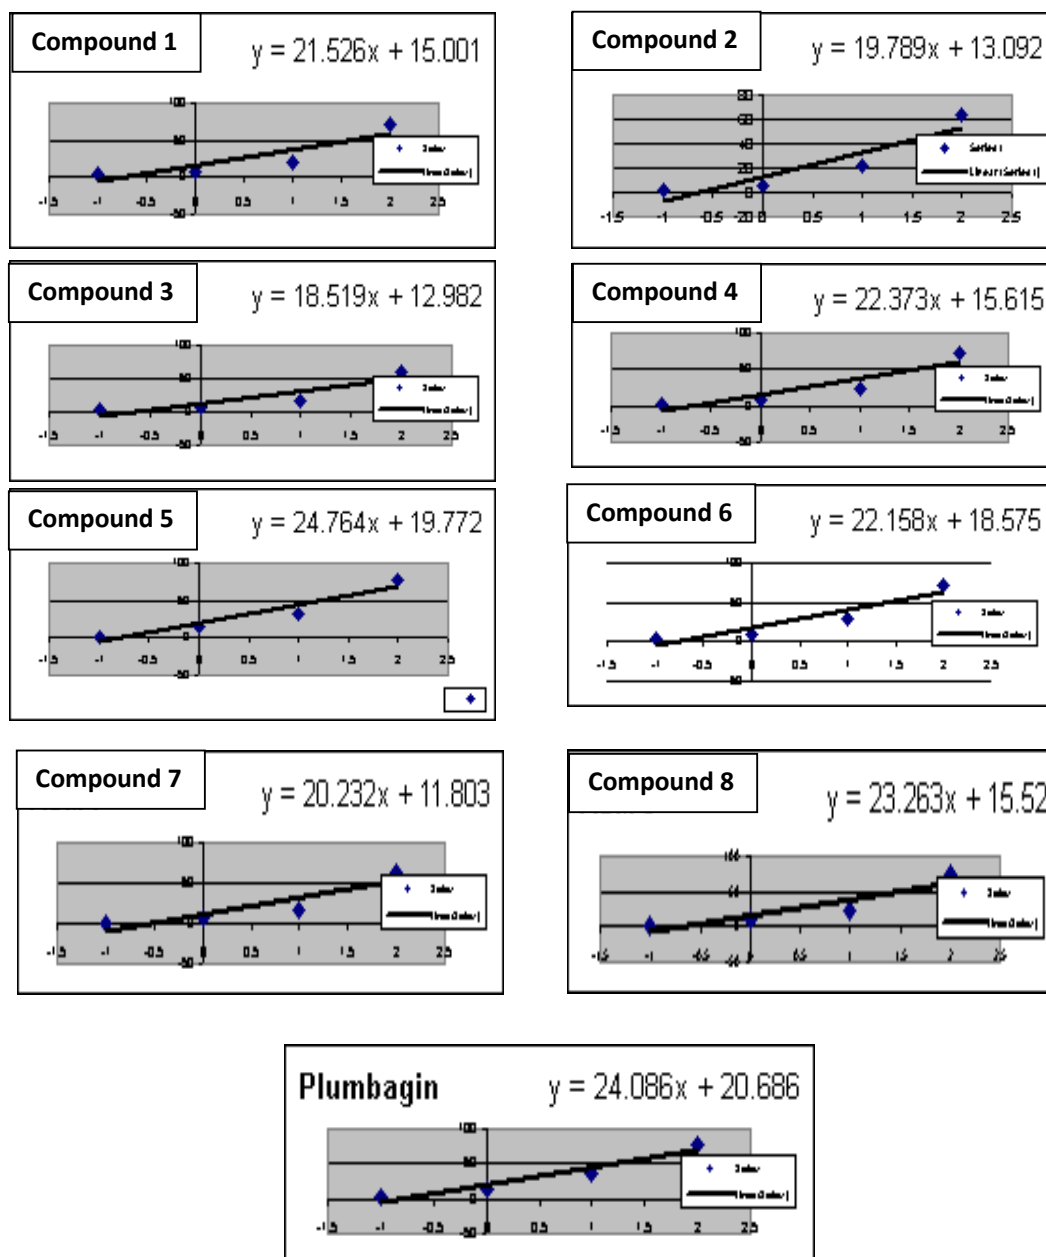

**Figure S4: Standard curves 3CL Protease SARS-CoV-2 Activity (MPro assay) on isolated compounds (1-8) from *Garcinia cambogia* Roxb. Fruits.**

X axis: Conc. (log/  $\mu$ M) , Y axis: Time ( $\Delta$ T)

**Table S3: Effect of *Garcinia cambogia* Roxb. isolated compounds on Human Coronavirus (COVID-19)**

| Sample        |               | Viral Titer |             |             | Inhibition | Reduction   | Log Difference |
|---------------|---------------|-------------|-------------|-------------|------------|-------------|----------------|
| Code          | Conc. $\mu$ M | CT          | IU/ml       | Log         | %          | %           |                |
| 1             | 10            | 25.46       | 191047.1964 | 5.281140669 | 87.91045   | 14.80286757 | -0.917589873   |
|               | 1             | 23.88       | 572856.6142 | 5.758045932 | 63.749384  | 7.109271923 | -0.44068461    |
| 2             | 10            | 25.16       | 235338.1316 | 5.371692301 | 85.107701  | 13.34205827 | -0.827038241   |
|               | 1             | 23.43       | 783201.2648 | 5.89387338  | 50.438683  | 4.918057979 | -0.304857162   |
| 3             | 10            | 23.61       | 691102.3995 | 5.839542401 | 56.266739  | 5.794543553 | -0.359188141   |
|               | 1             | 22.75       | 1256387.904 | 6.099123746 | 20.495227  | 1.606890239 | -0.099606796   |
| 4             | 10            | 23.95       | 545653.8422 | 5.736917218 | 65.470787  | 7.450127423 | -0.461813324   |
|               | 1             | 22.81       | 1205073.177 | 6.08101342  | 23.742445  | 1.899052091 | -0.117717122   |
| 5             | 10            | 27.86       | 36035.25597 | 4.556727611 | 97.719673  | 26.48934197 | -1.642002931   |
|               | 1             | 25.95       | 135906.3252 | 5.13323967  | 91.399789  | 17.18885609 | -1.065490872   |
| 6             | 10            | 25.64       | 168581.413  | 5.22680969  | 89.332095  | 15.67935314 | -0.971920852   |
|               | 1             | 22.71       | 1291806     | 6.111197297 | 18.253954  | 1.412115665 | -0.087533245   |
| 7             | 10            | 25.79       | 151891.6408 | 5.181533873 | 90.388231  | 16.40975781 | -1.017196669   |
|               | 1             | 24.26       | 439893.1485 | 5.643347198 | 72.16337   | 8.959630367 | -0.555383344   |
| 8             | 10            | 26.06       | 125903.3844 | 5.100037405 | 92.032779  | 17.72448616 | -1.098693137   |
|               | 1             | 23.78       | 614086.8665 | 5.788229809 | 61.140316  | 6.622335496 | -0.410500733   |
| Remdesivir    | 10            | 28.66       | 20666.00795 | 4.315256592 | 98.692246  | 30.38483343 | -1.88347395    |
|               | 1             | 26.86       | 72204.85253 | 4.858566385 | 95.430846  | 21.61997764 | -1.340164157   |
| * Post. cont. |               | 22.42       | 1580267.258 | 6.198730542 | 0          | 0           | 0              |

\* Post. cont.: COVID-19 Positive control template  
 \* IU/ml: International unit per millimeter

**Table S4: Evaluation of EC<sub>50</sub> and percentage of inhibition of compound 5 on Human Coronavirus (COVID-19) compared to Remdesivir.**

| Sample        |               | Viral Titer |             |          | Inhibition | Reduction | Log diff  | EC50     |
|---------------|---------------|-------------|-------------|----------|------------|-----------|-----------|----------|
| Code          | Conc. $\mu$ M | CT          | IU/ml       | Log      | %          | %         |           |          |
| Compound 5    | 10            | 27.86       | 36035.25597 | 4.556727 | 97.268035  | 25.54673  | -1.56352  | 0.016997 |
|               | 1             | 25.95       | 135906.3252 | 5.13323  | 89.696442  | 16.12699  | -0.987012 |          |
|               | 0.1           | 24.75       | 312929.2783 | 5.49544  | 76.275682  | 10.20883  | -0.624806 |          |
|               | 0.01          | 23.46       | 767040.3613 | 5.88481  | 41.847853  | 3.84680   | -0.235434 |          |
|               | 0.001         | 23.03       | 1034210.374 | 6.01460  | 21.592713  | 1.72613   | -0.105643 |          |
| Remdesivir    | 10            | 28.36       | 25457.05872 | 4.405808 | 98.070007  | 28.01263  | -1.714444 | 0.008182 |
|               | 1             | 27.11       | 60688.5403  | 4.783106 | 95.398979  | 21.84788  | -1.337145 |          |
|               | 0.1           | 26.44       | 96680.45161 | 4.98533  | 92.6703    | 18.54357  | -1.134913 |          |
|               | 0.01          | 23.84       | 589005.6799 | 5.77011  | 55.345316  | 5.72089   | -0.350132 |          |
|               | 0.001         | 22.96       | 1085769.415 | 6.03573  | 17.683832  | 1.38090   | -0.084514 |          |
| * Post. cont. |               | ---         | 1319023.28  | 6.12025  | 0          | 0         | 0         |          |

\* Post. cont.: COVID-19 Positive control template  
 \* IU/ml: International unit per millimeter

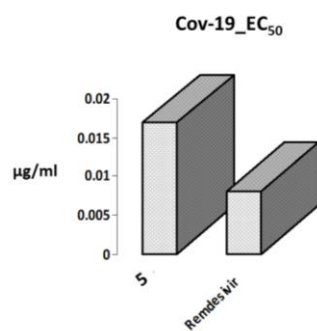

**Figure S5. Effect of compound 5 on Human coronavirus (COVID-19) compared to Remdesivir.**

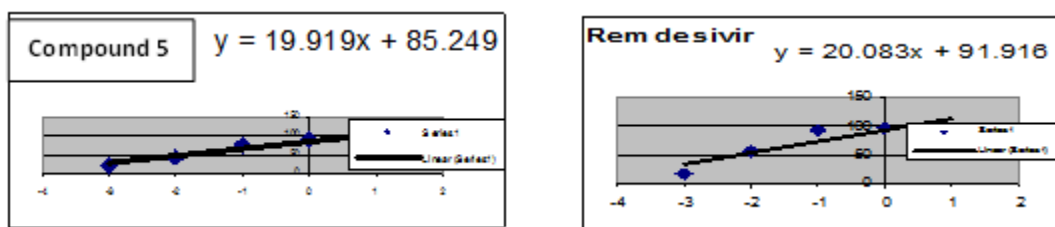

**Figure S6: Standard curves of effect of compound 5 on Human Coronavirus (COVID-19) compared to Remdesivir.**

X axis: Conc. (log/  $\mu$ M) , Y axis: Time ( $\Delta$ T)
